# Supplementary material for: Antioxidant and Anti-Osteoporotic Activities of Aromatic Compounds and Sterols from Hericium erinaceum
Source: PubMed Central journal article supplement (PMC6155785; doi:10.3390/molecules22010108), 2017-01-11
Supplement: molecules-22-00108-s001.pdf [file molecules-22-00108-s001.pdf]

# **Supplementary Materials: Antioxidant and Anti-Osteoporotic Activities of Aromatic Compounds and Sterols from *Hericium erinaceum***

Wei Li, Sang Hyun Lee, Hae Dong Jang, Jin Yeul Ma and Young Ho Kim

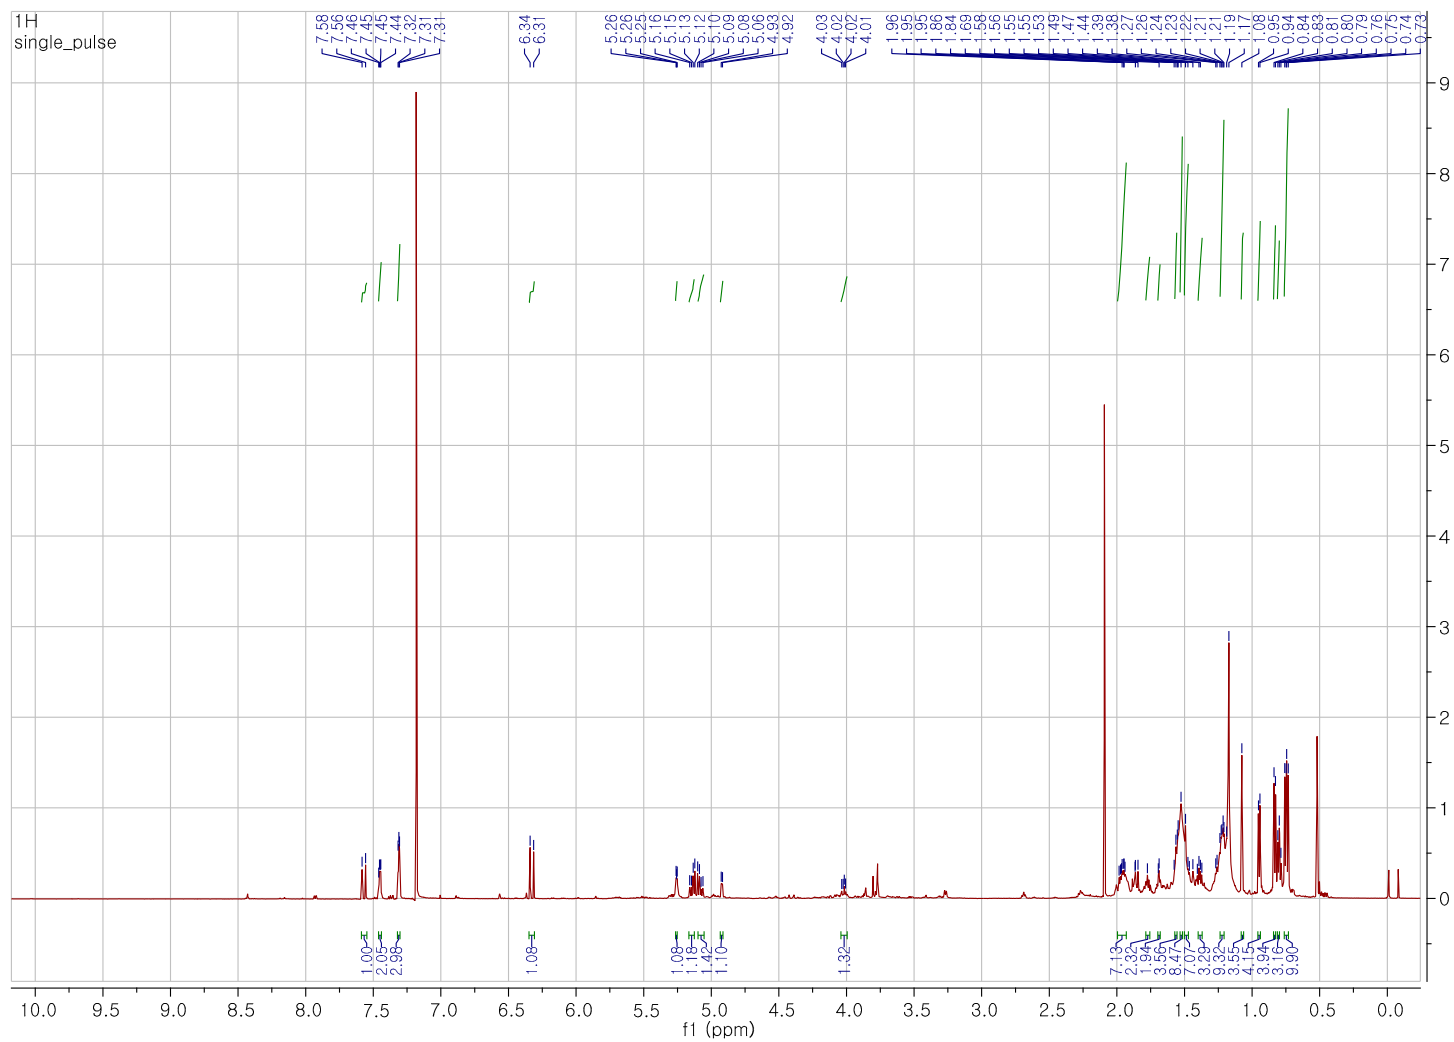

**Figure S1.** <sup>1</sup>H-NMR spectrum of compound **6** (600 MHz, CDCl<sub>3</sub>).

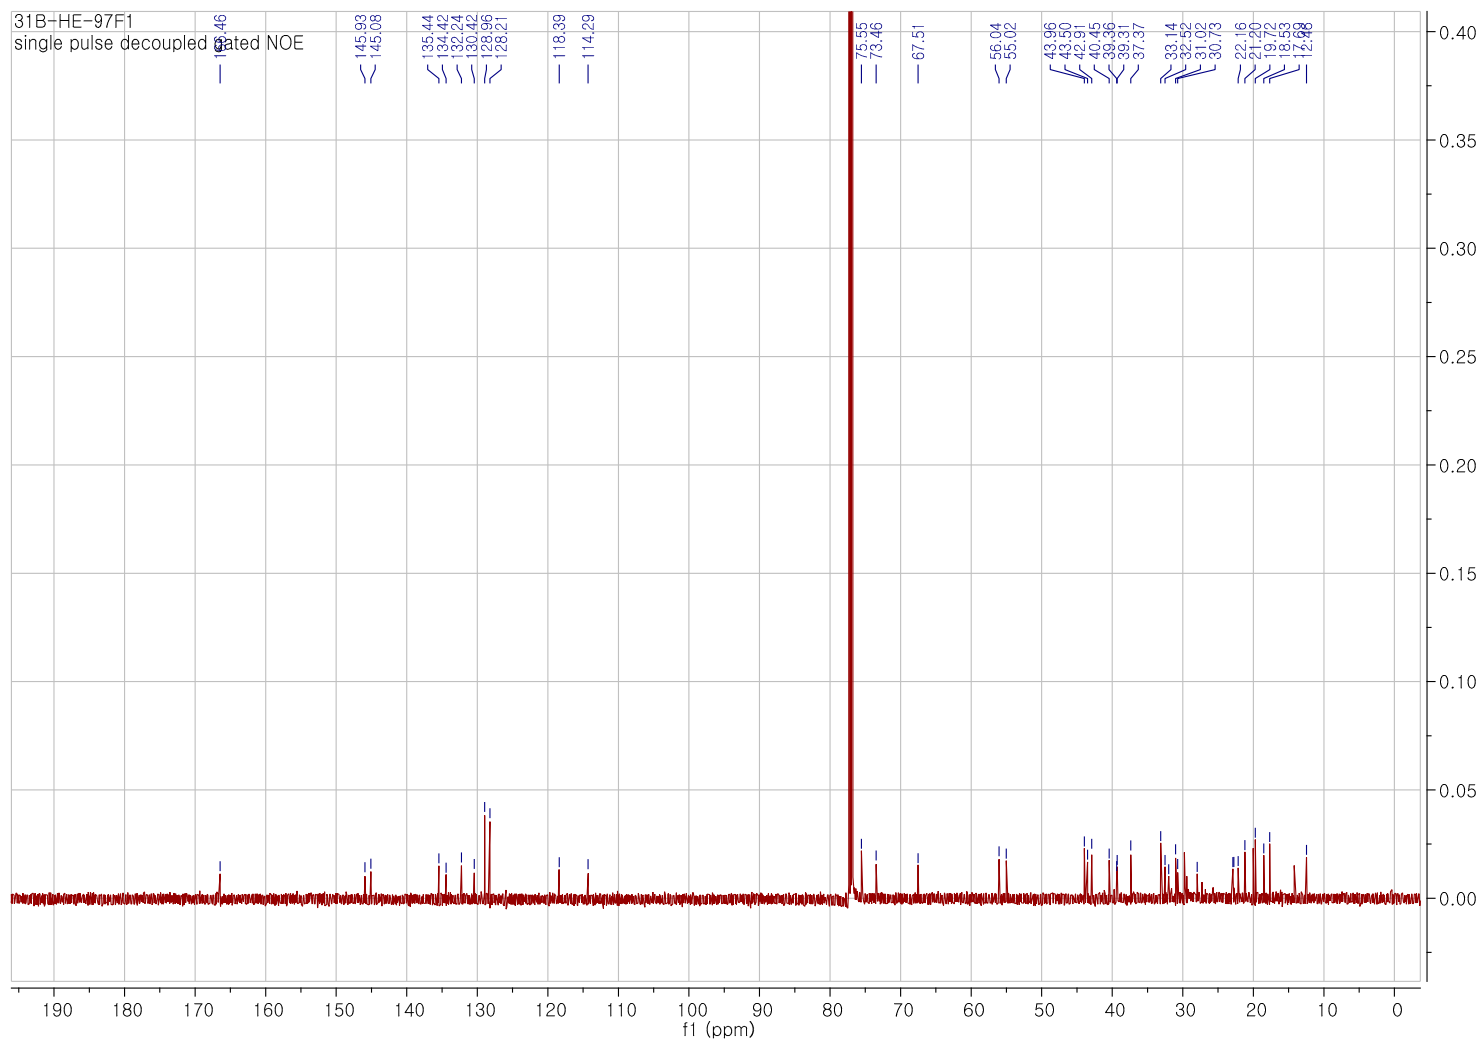

Figure S2.  $^{13}\text{C}$ -NMR spectrum of compound 6 (150 MHz,  $\text{CDCl}_3$ ).

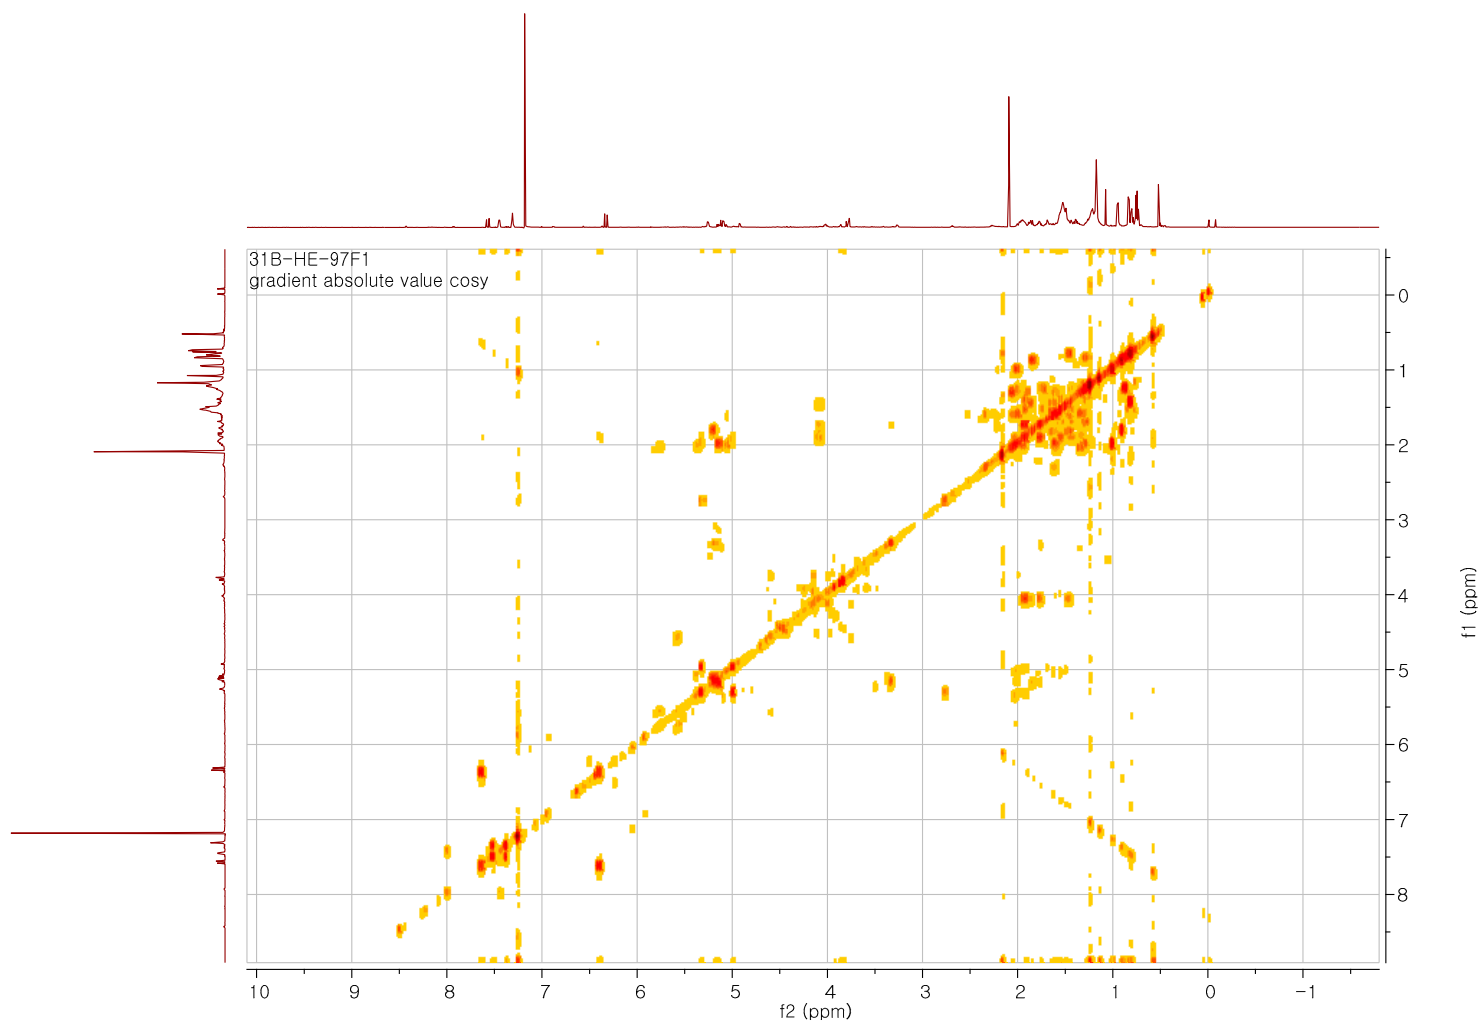

**Figure S3.** COSY spectrum of compound 6 (CDCl<sub>3</sub>).

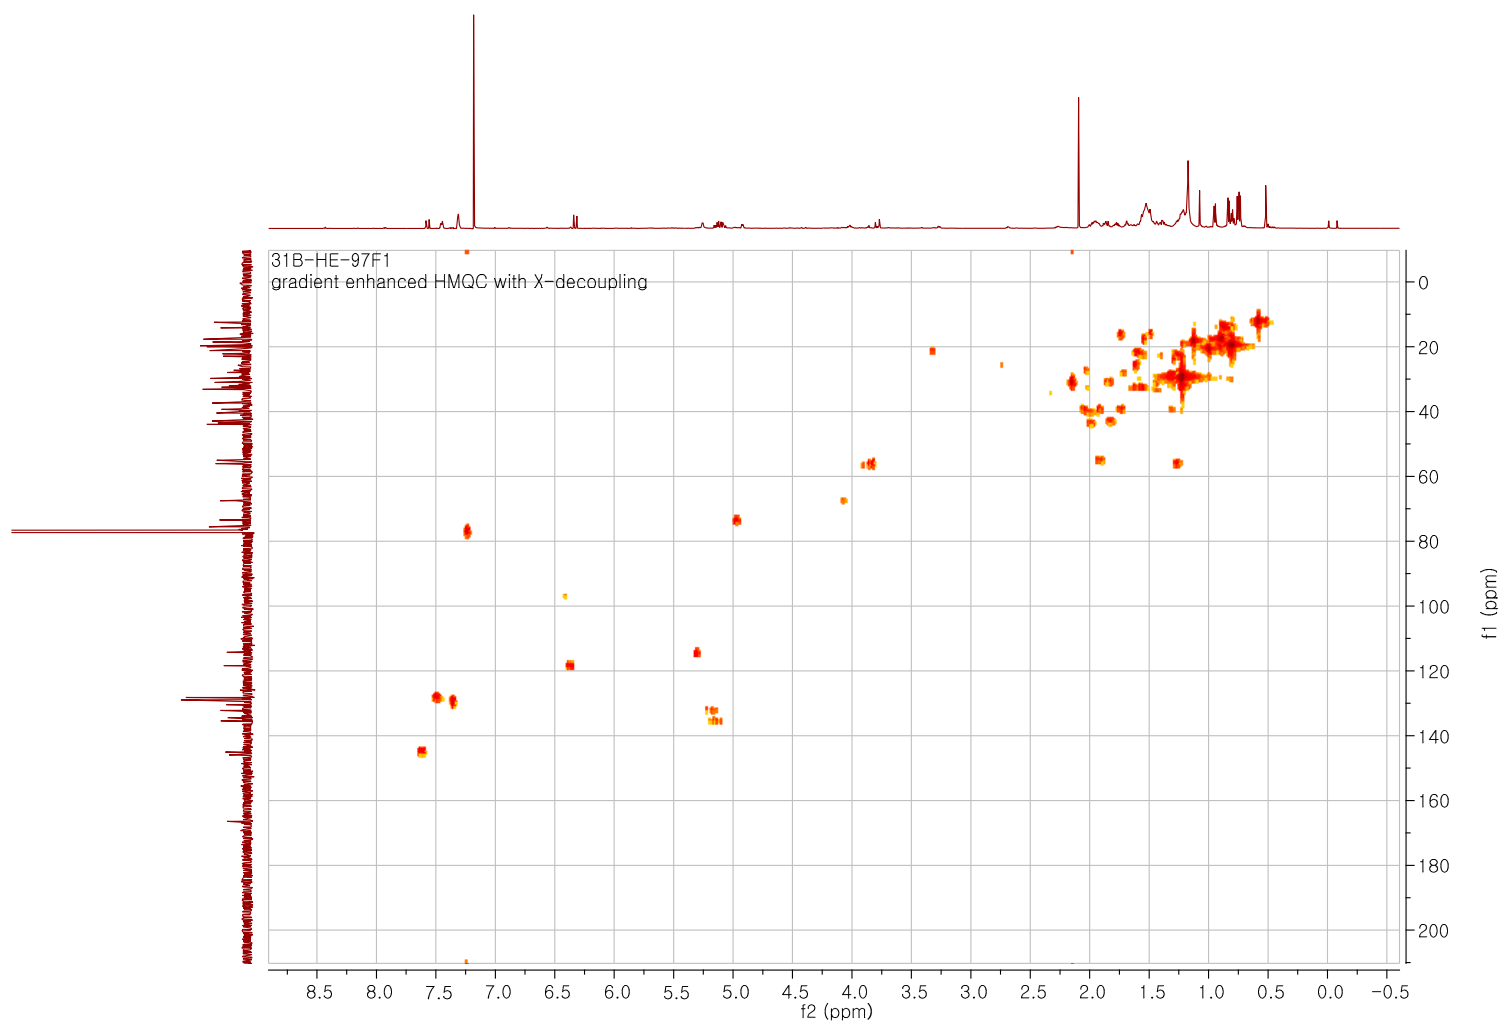

Figure S4. HMQC spectrum of compound 6 (CDCl<sub>3</sub>).

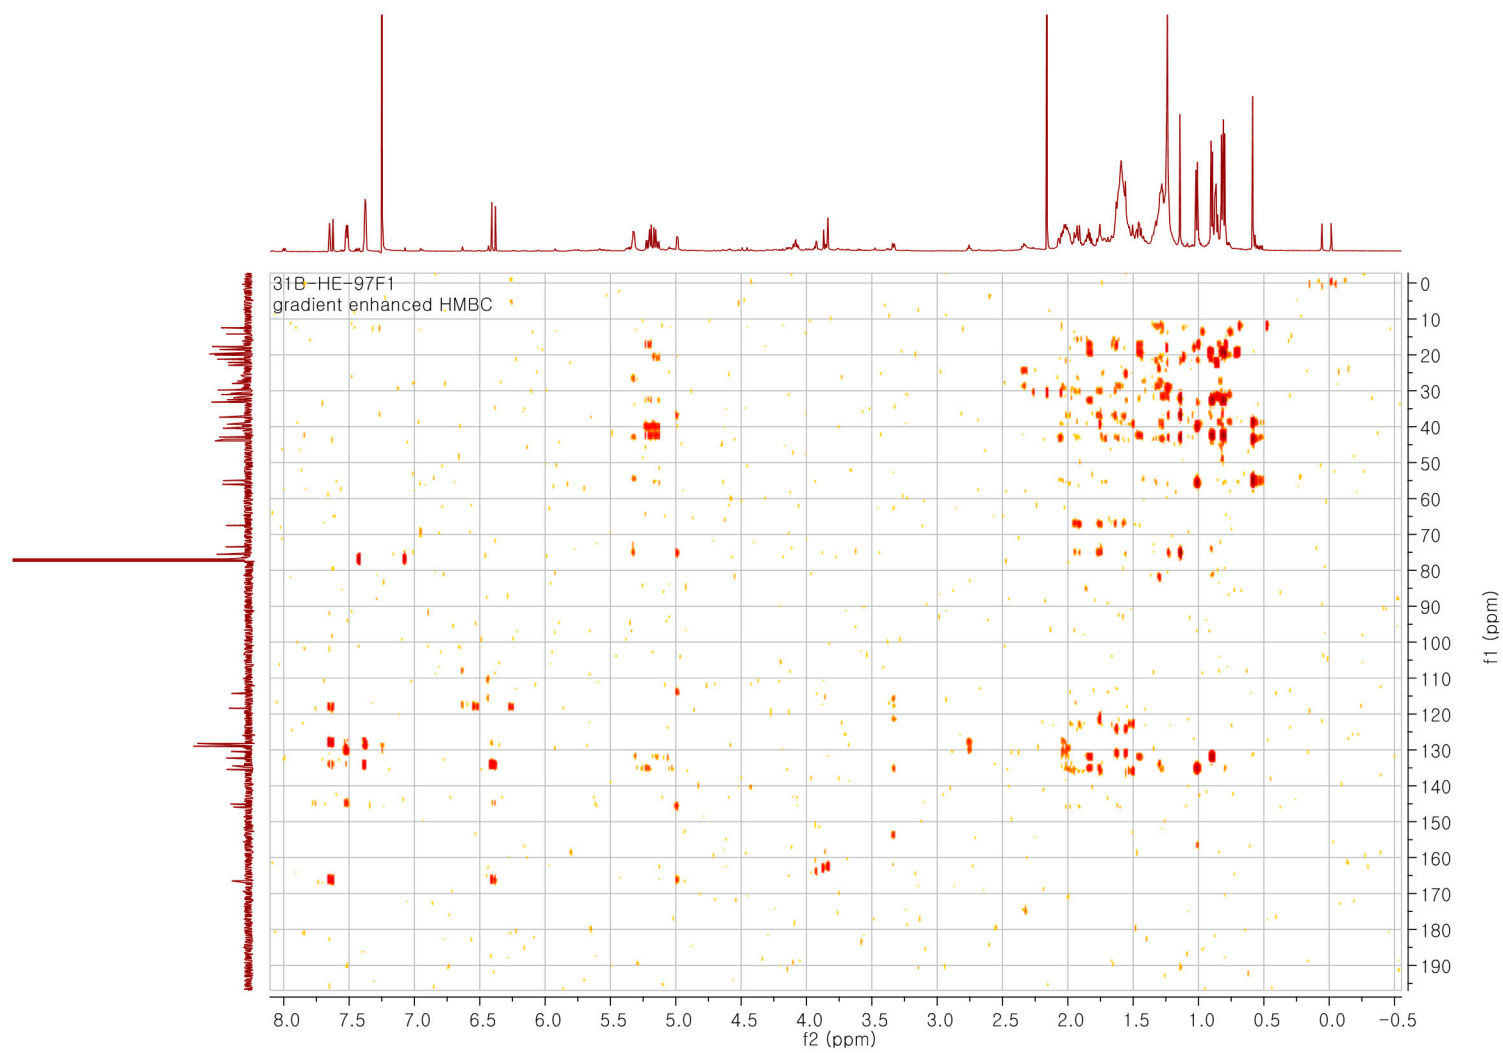

Figure S5. HMBC spectrum of compound 6 (CDCl<sub>3</sub>).

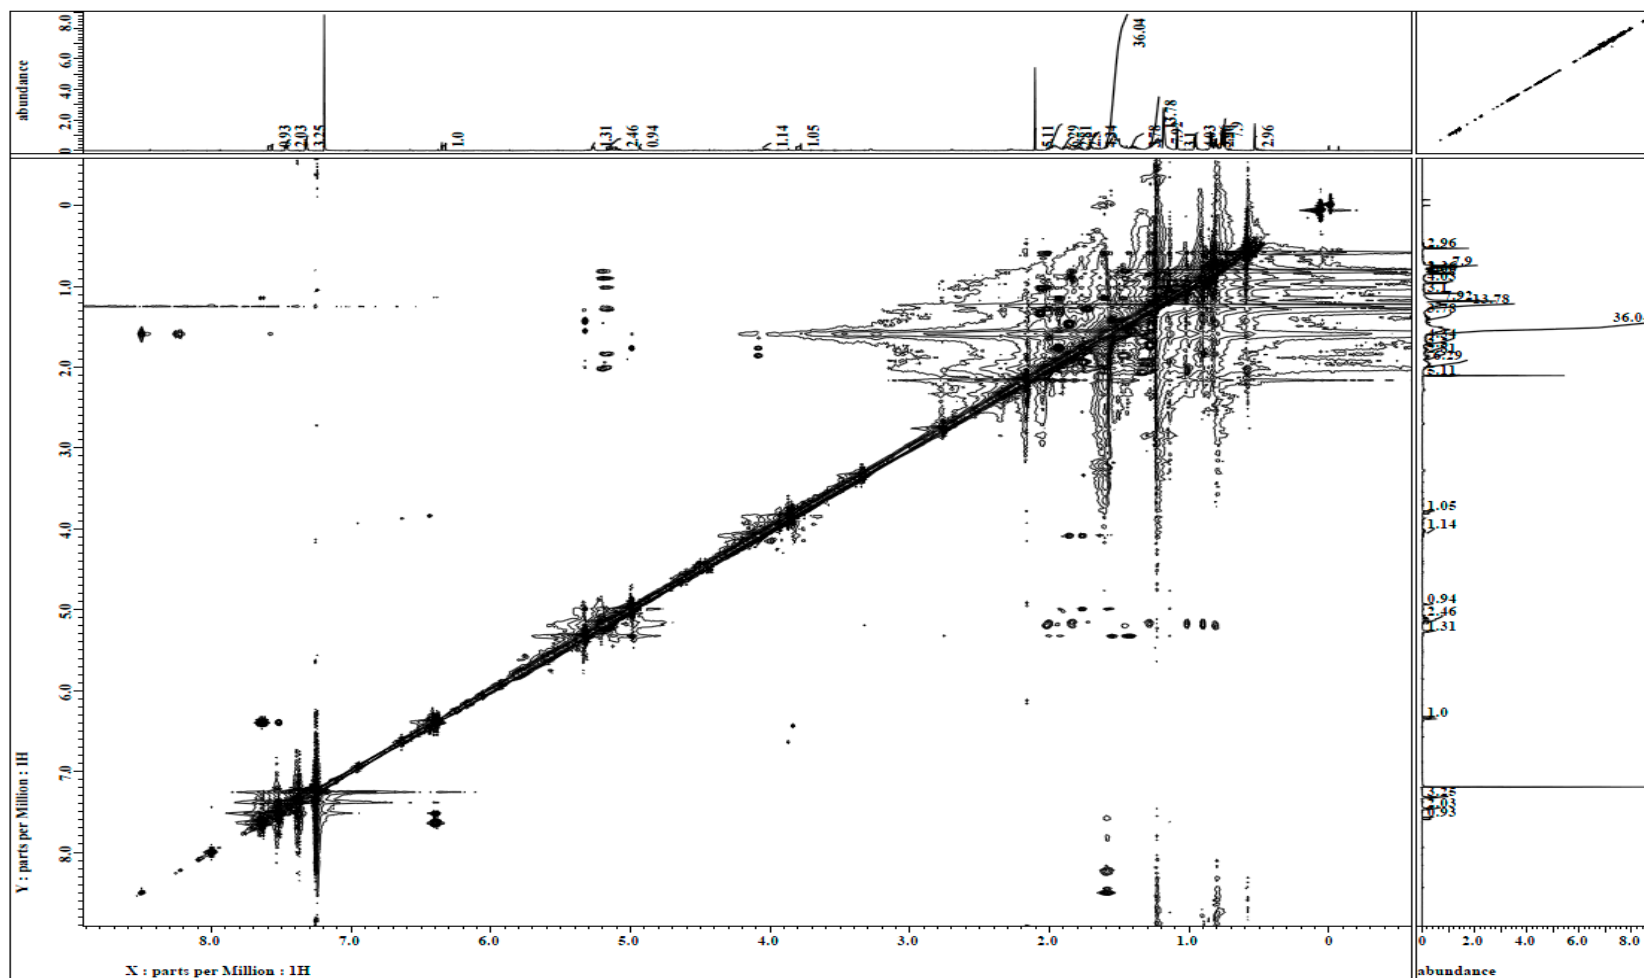Figure S6. NOESY spectrum of compound 6 (CDCl<sub>3</sub>).
